# Supplementary material for: RHPS4 shifted the conformation ensemble equilibrium of Tel24 by preferentially stabilizing the (3 + 1) hybrid-2 conformation
Source: PubMed Central journal article supplement — RSC Adv. 2022 Sep 13;12(40):26011–5. doi: 10.1039/d2ra03959a (PMC9469490; doi:10.1039/d2ra03959a), 2022-09-13
Supplement: RA-012-D2RA03959A-s001.pdf [file RA-012-D2RA03959A-s001.pdf]

## Supplementary Information

### **RHPS4 shifted the conformation ensemble equilibrium of Tel24 by preferentially stabilizing the (3+1) hybrid-2 conformation**

Zhangqian Wang,<sup>a,b</sup> Jieya Deng,<sup>a</sup> Muhammad Umer,<sup>c</sup> Naureen Anwar,<sup>d</sup> Yidang Wang,<sup>a</sup> Xingxing Dong,<sup>a</sup>  
Hua Xu,<sup>a</sup> Yi He,<sup>a</sup> Chao Gao<sup>\*a</sup>

<sup>a</sup>National R&D Center for Se-rich Agricultural Products Processing, Hubei Engineering Research Center for Deep Processing of Green Se-rich Agricultural Products, School of Modern Industry for Selenium Science and Engineering, Wuhan Polytechnic University, Wuhan 430023, China.

<sup>b</sup>State Key Laboratory of Biocatalysis and Enzyme Engineering, School of Life Sciences, Hubei University, Wuhan 430062, China.

<sup>c</sup>Institute for Forest Resources and Environment of Guizhou and Forestry College, Research Center of Forest Ecology, Guizhou University, Guiyang, 550025, China.

<sup>d</sup>Department of Zoology, University of Narowal, Narowal, Punjab, 51600, Pakistan.

|                                                                                                                                                                                          |          |
|------------------------------------------------------------------------------------------------------------------------------------------------------------------------------------------|----------|
| <b>Supplementary tables and figures.....</b>                                                                                                                                             | <b>2</b> |
| Table S1. DNA sequences used in the experiment.....                                                                                                                                      | 3        |
| Figure S1. The CD spectra of different of G-quadruplexes in a solution containing 40 wt% PEG200.....                                                                                     | 3        |
| Figure S2. Effects of the RHPS4 on the CD spectra of Tel24 in a solution containing 40 wt% PEG200.....                                                                                   | 4        |
| Figure S3. Effects of the RHPS4 on the CD spectra of <i>c-KIT1</i> in a solution containing different concentrations of PEG200.....                                                      | 4        |
| Figure S4. Topology changes of Tel24 in 10 mM Tris-HCl (pH 7.5) buffer containing 100 mM KCl during melting.....                                                                         | 5        |
| Figure S5. Benesi-Hildebrand plot of $1/(F-F_0)$ versus $1/[DNA]$ . The dissociation constant ( $K_D$ ) value of RHPS4 and Tel24 in solutions in the absence and presence of PEG200..... | 5        |
| Figure S6. Effects of the RHPS4 on the CD spectra of Tel24 in a solution containing 20 wt% PEG200 and different concentrations of KCl.....                                               | 6        |

Table S1 Oligonucleotide sequences used in the experiment

| Name              | Origin         | Sequence(5'→3')                   |
|-------------------|----------------|-----------------------------------|
| Tel24             | Human telomere | TTAGGGTTAGGGTTAGGGTAAGGG          |
| <i>c-MYC Pu22</i> | Promoter       | TGAGGGTGGGTAGGGTGGGTAA            |
| <i>KRAS</i>       | Promoter       | AGGGCGGTGTGGGAAGAGGGGAAGAGGGGGAGG |
| <i>c-KIT1</i>     | Promoter       | AGGGAGGGCGCTGGGAGGAGGG            |

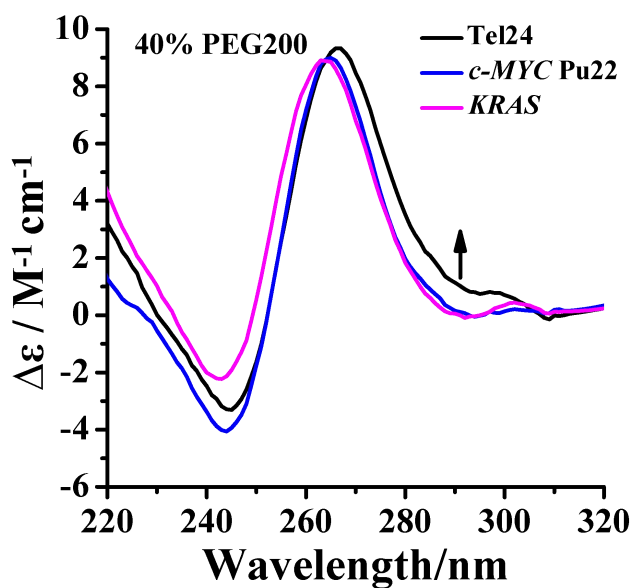

Fig. S1 The CD spectra of different of G-quadruplexes in a solution containing 40 wt% PEG200. The concentration of oligonucleotide was 10  $\mu\text{M}$ .

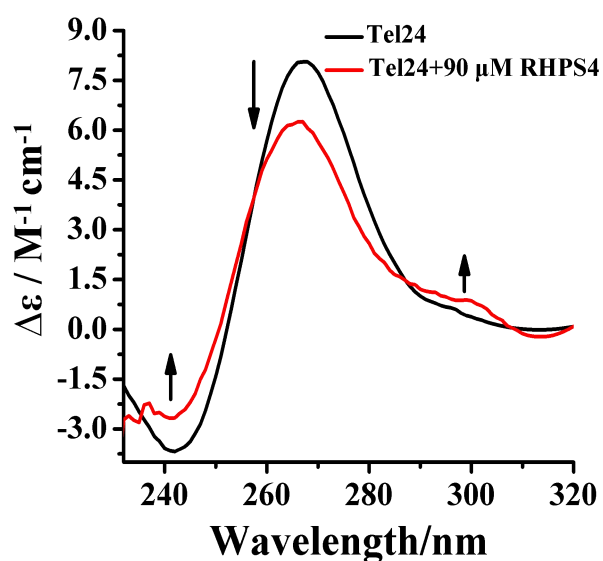

Fig. S2 Effects of the RHPS4 on the CD spectra of Tel24 in a solution containing 40 wt% PEG200. The concentration of Tel24 was 10  $\mu\text{M}$ . The concentration of RHPS4 was 90  $\mu\text{M}$ .

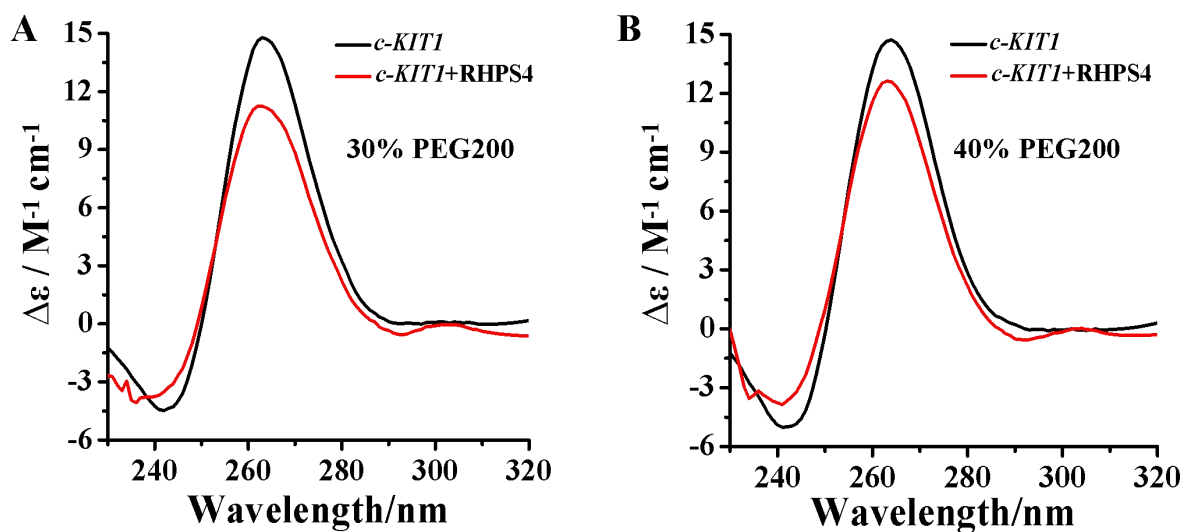

Fig. S3 Effects of the RHPS4 on the CD spectra of *c-KIT1* in a solution containing 30 wt% (A) and 40 wt% (B) PEG200. The concentration of *c-KIT1* was 10  $\mu\text{M}$ . The concentration of RHPS4 was 90  $\mu\text{M}$ .

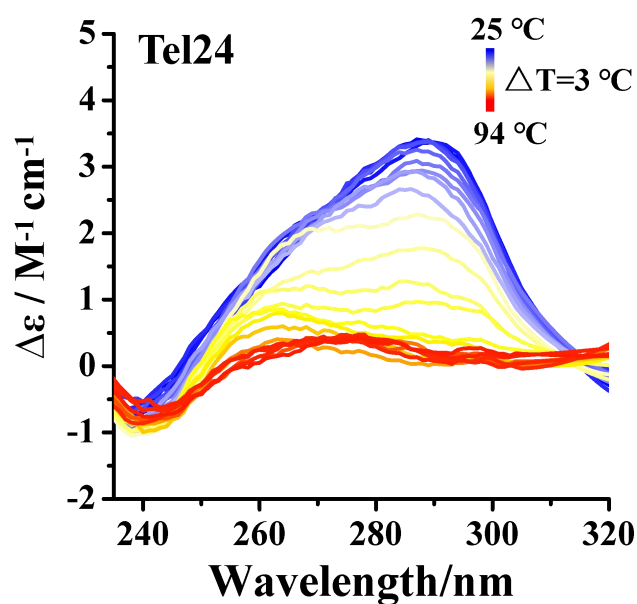

Fig. S4 Topology changes of Tel24 in 10 mM Tris-HCl (pH 7.5) buffer containing 100 mM KCl during melting. The concentration of Tel24 was 10  $\mu\text{M}$ . The concentration of RHPS4 was 90  $\mu\text{M}$ .

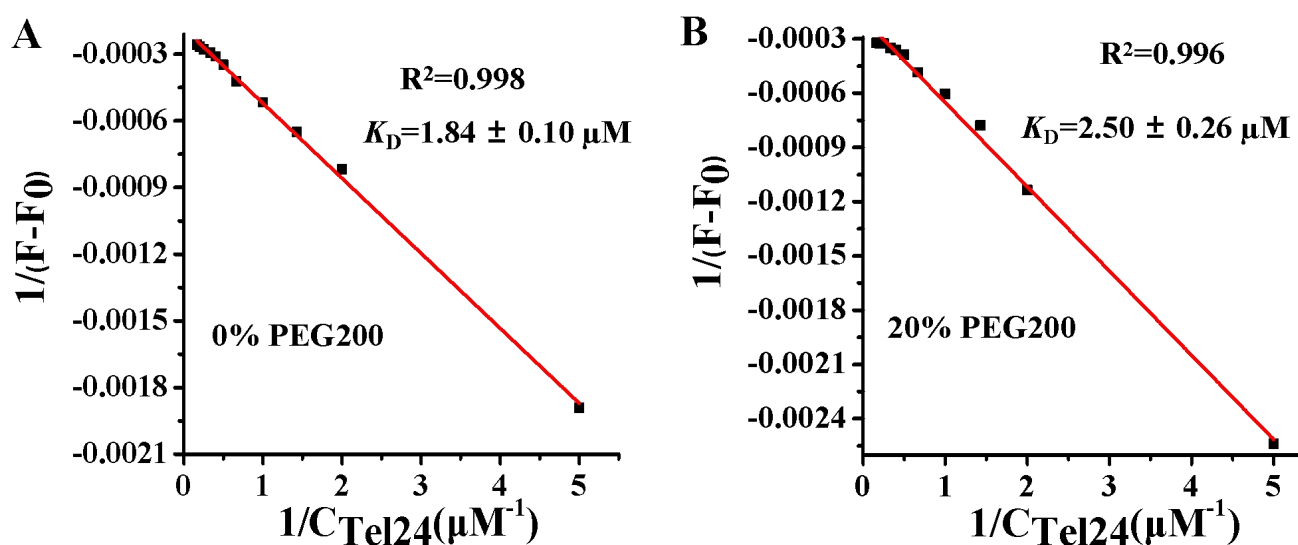

Fig. S5 Benesi-Hildebrand plot of  $1/(F-F_0)$  versus  $1/[\text{DNA}]$ . The dissociation constant ( $K_D$ ) value of RHPS4 and Tel24 in solutions in the absence (A) and presence (B) of PEG200 was calculated as  $1.84 \pm 0.10 \mu\text{M}$  and  $2.50 \pm 0.26 \mu\text{M}$ , respectively.

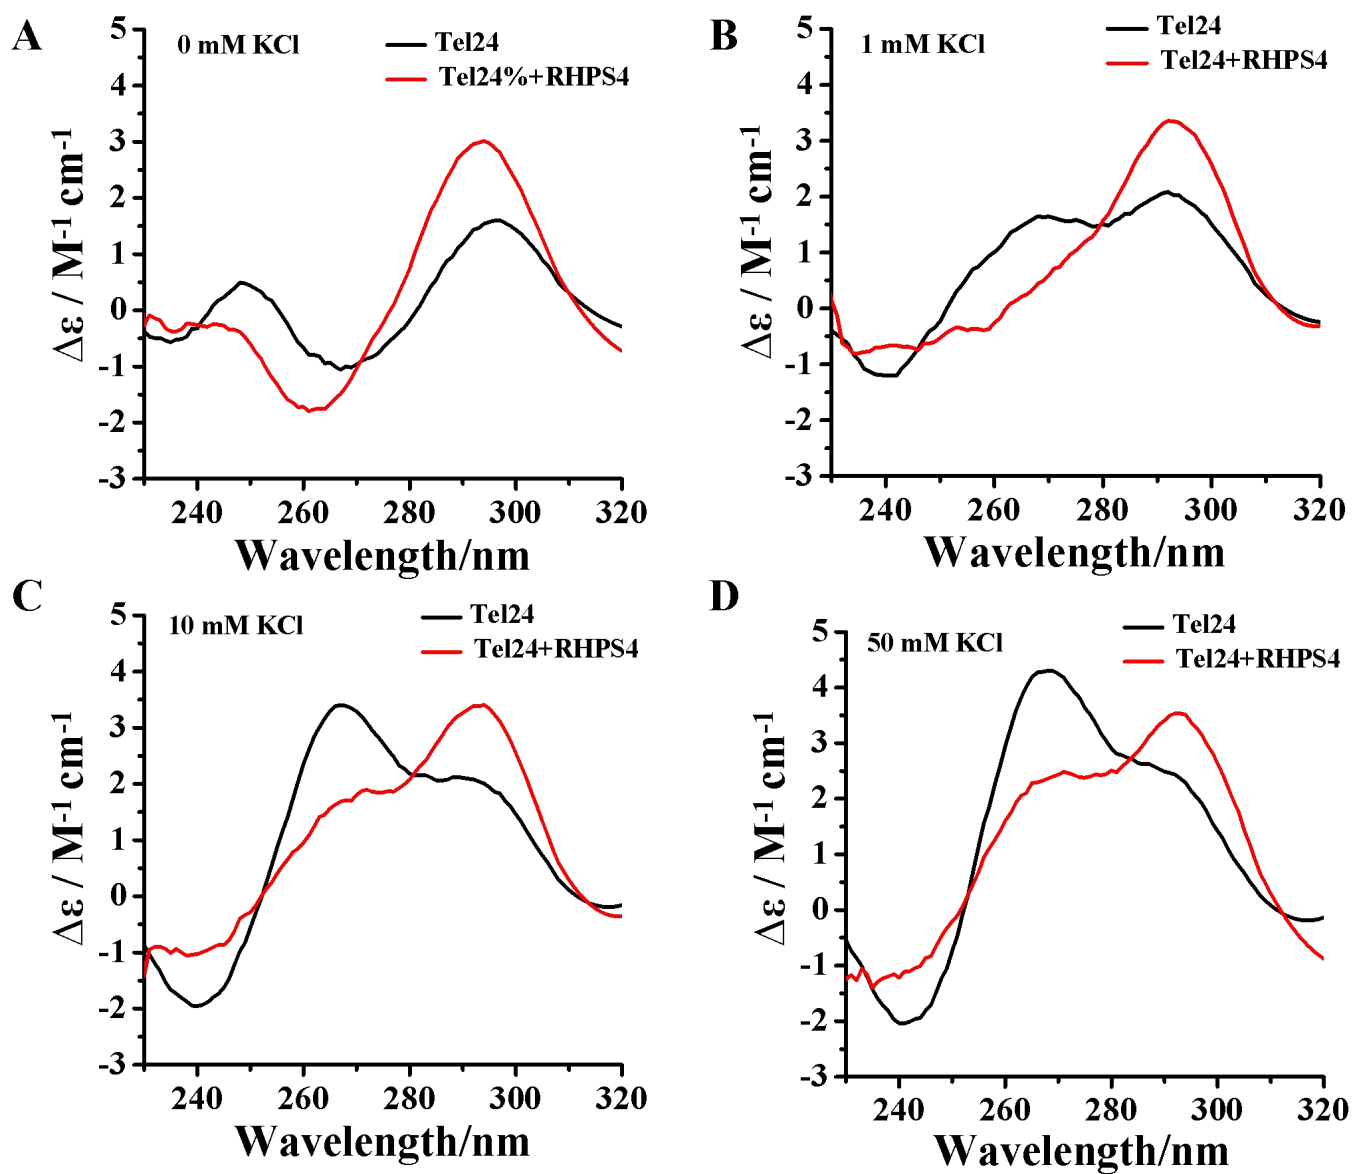

Fig. S6 Effects of the RHPS4 on the CD spectra of Tel24 in a solution containing 20 wt% PEG200 and different concentrations of KCl. (A) 0 mM KCl, (B) 1 mM KCl, (C) 10 mM KCl, (D) 50 mM KCl.
